# Supplementary material
Source: publisher figshare collection journal article supplement (https://tandf.figshare.com/ndownloader/files/17064749)
Supplement: Supplementary file 1 [file 17064749]

Online Supplement for “Bayesian Closed-loop Robust Process Design Considering Model Uncertainty and Data Quality” by “Linhan Ouyang, Jianxiong Chen, Yizhong Ma, Chanseok Park, Jionghua (Judy) Jin”

## 1. Computational cost analysis in Section 5.1

The computational times are presented in Table 1.

**Table 1.** Summary statistics of the average time (unit: second) by different online design approaches

| $m_0 = 50$ |       |       | $m_0 = 100$ |       |       |
|------------|-------|-------|-------------|-------|-------|
|            | $L_d$ | $L_p$ |             | $L_d$ | $L_p$ |
| Min        | 0.405 | 0.466 | Min         | 0.449 | 0.409 |
| Median     | 0.423 | 0.506 | Median      | 0.553 | 0.471 |
| Mean       | 0.421 | 0.502 | Mean        | 0.545 | 0.468 |
| Max        | 0.442 | 0.665 | Max         | 0.858 | 0.648 |

An interesting phenomenon can be found that the computational cost of the proposed online approach  $L_p$  is smaller than that of the existing online approach  $L_d$  under  $m_0 = 100$ . It is because the model parameters are updated at each run and the computation is mainly used for estimating model parameters. There is no doubt that the computational cost of the online approach  $L_d$  is smaller than that of the online approach  $L_p$  when most of the online data are used in the updating process (e.g.,  $m_0 = 50$ ), since examining the data quality for every incoming response data also needs extra time. The  $p$  value for the case  $m_0 = 50$  is 0.189, which indicate that there is no significant difference between the two online approaches. Furthermore, the  $p$  value for the case  $m_0 = 100$  is 0.000, which means that the proposed

online approach  $L_p$  at  $m_0=100$  does not necessarily increase the computational cost since its computational cost is smaller than that of the online approach  $L_d$ .

## 2. Detailed proofs for some problems

**Derivation of Eq. (7):** the meaning of Eq. (7) is posterior distribution of the model parameters. By adding and subtracting  $\mathbf{X}_t \hat{\boldsymbol{\beta}}_t$  in each parenthesis of Eq. (6), it yields

$$\begin{aligned}
& [(\mathbf{y}_t - \mathbf{X}_t \hat{\boldsymbol{\beta}}_t)^T (\mathbf{y}_t - \mathbf{X}_t \hat{\boldsymbol{\beta}}_t) + (\boldsymbol{\beta}_t - \hat{\boldsymbol{\beta}}_t)^T \mathbf{X}_t^T \mathbf{X}_t (\boldsymbol{\beta}_t - \hat{\boldsymbol{\beta}}_t)]^{-n_0/2} \\
& = [(n_0 - r - 1)s^2 + (\boldsymbol{\beta}_t - \hat{\boldsymbol{\beta}}_t)^T \mathbf{X}_t^T \mathbf{X}_t (\boldsymbol{\beta}_t - \hat{\boldsymbol{\beta}}_t)]^{-n_0/2} \\
& = \left[ 1 + \frac{(\boldsymbol{\beta}_t - \hat{\boldsymbol{\beta}}_t)^T \mathbf{X}_t^T \mathbf{X}_t (\boldsymbol{\beta}_t - \hat{\boldsymbol{\beta}}_t)}{(n_0 - r - 1)s^2} \right]^{-n_0/2} [(n_0 - r - 1)s^2]^{n_0/2} \\
& \propto \left[ 1 + \frac{(\boldsymbol{\beta}_t - \hat{\boldsymbol{\beta}}_t)^T \mathbf{X}_t^T \mathbf{X}_t (\boldsymbol{\beta}_t - \hat{\boldsymbol{\beta}}_t)}{(n_0 - r - 1)s^2} \right]^{-n_0/2} [s^2 |\mathbf{X}_t^T \mathbf{X}_t|^{-1}]^{-1/2}
\end{aligned} \tag{A.1}$$

where the estimated variance  $s^2$  and the estimated model parameters  $\hat{\boldsymbol{\beta}}_t$  can be calculated by

$(\mathbf{y}_t - \mathbf{X}_t \hat{\boldsymbol{\beta}}_t)^T (\mathbf{y}_t - \mathbf{X}_t \hat{\boldsymbol{\beta}}_t) / (n_0 - r - 1)$  and  $\hat{\boldsymbol{\beta}}_t = (\mathbf{X}_t^T \mathbf{X}_t)^{-1} \mathbf{X}_t^T \mathbf{y}_t$ , respectively. It can be seen from Eq. (7)

that  $\left[ 1 + \frac{(\boldsymbol{\beta}_t - \hat{\boldsymbol{\beta}}_t)^T \mathbf{X}_t^T \mathbf{X}_t (\boldsymbol{\beta}_t - \hat{\boldsymbol{\beta}}_t)}{(n_0 - r - 1)s^2} \right]^{-[n_0 - (r+1) + (r+1)]/2} [s^2 |\mathbf{X}_t^T \mathbf{X}_t|^{-1}]^{-1/2}$  has the form of a multivariate student  $t$

distribution with degrees of freedom  $n_0 - r - 1$ . Then, Eq. (7) can be rewritten as

$$\boldsymbol{\beta}_t | \mathbf{y}_t, \mathbf{X}_t \sim t_{n_0 - r - 1} \left[ \hat{\boldsymbol{\beta}}_t, s^2 (\mathbf{X}_t^T \mathbf{X}_t)^{-1} \right].$$

**Derivation of Theorem 1:** We can calculate the following expression

$$\begin{aligned}
& (\mathbf{B} + \mathbf{C}\mathbf{D}^T)[\mathbf{B}^{-1} - \mathbf{B}^{-1}\mathbf{C}(1 + \mathbf{D}^T\mathbf{B}^{-1}\mathbf{C})^{-1}\mathbf{D}^T\mathbf{B}^{-1}] \\
& = \mathbf{E} - (\mathbf{C} + \mathbf{C}\mathbf{D}^T\mathbf{B}^{-1}\mathbf{C})(1 + \mathbf{D}^T\mathbf{B}^{-1}\mathbf{C})^{-1}\mathbf{D}^T\mathbf{B}^{-1} + \mathbf{C}\mathbf{D}^T\mathbf{B}^{-1} \\
& = \mathbf{E}
\end{aligned}$$

where  $\mathbf{E}$  is the identity matrix. Based on the invertible matrix theorem, the inverse of the matrix

$(\mathbf{B} + \mathbf{C}\mathbf{D}^T)$  can be given as  $\mathbf{B}^{-1} - \mathbf{B}^{-1}\mathbf{C}(1 + \mathbf{D}^T\mathbf{B}^{-1}\mathbf{C})^{-1}\mathbf{D}^T\mathbf{B}^{-1}$ .

**Derivation of Lemma 1:** Since  $\mathbf{P}_{t+1} = (\mathbf{X}_{t+1}^T \mathbf{X}_{t+1})^{-1}$ , the updated model parameters can be calculated

by  $\hat{\boldsymbol{\beta}}_{t+1|t} = (\mathbf{X}_{t+1}^T \mathbf{X}_{t+1})^{-1} \mathbf{X}_{t+1}^T \mathbf{y}_{t+1}$  based on ordinary least square method. Let  $\mathbf{X}_{t+1} = [\mathbf{X}_t^T \quad \mathbf{x}_t^*]^T$ ,

$\mathbf{y}_{t+1} = \begin{bmatrix} \mathbf{y}_t^T & y_{t+1} \end{bmatrix}^T$ ,  $\mathbf{x}_t^*$  is the optimal input settings at step  $t$ , and  $y_{t+1}$  is the new measurement of the response at step  $(t+1)$ . The updated model parameters can be written as

$$\hat{\boldsymbol{\beta}}_{t+1|t} = [\mathbf{X}_t^T \mathbf{X}_t + \mathbf{x}_t^* \mathbf{x}_t^{*T}]^{-1} [\mathbf{X}_t^T \mathbf{y}_t + \mathbf{x}_t^* y_{t+1}].$$

Let  $\mathbf{P}_t = (\mathbf{X}_t^T \mathbf{X}_t)^{-1}$ ,  $\mathbf{P}_{t+1}$  can be obtained as  $\mathbf{P}_t - \mathbf{P}_t \mathbf{x}_t^* k^{-1} \mathbf{x}_t^{*T} \mathbf{P}_t$  based on Theorem 1. The calculation process for  $\hat{\boldsymbol{\beta}}_{t+1|t}$  can be rewritten as

$$\begin{aligned} \hat{\boldsymbol{\beta}}_{t+1|t} &= \mathbf{P}_{t+1} [\mathbf{X}_t^T \mathbf{y}_t + \mathbf{x}_t^* y_{t+1}] \\ &= (\mathbf{P}_t - \mathbf{P}_t \mathbf{x}_t^* k^{-1} \mathbf{x}_t^{*T} \mathbf{P}_t) [\mathbf{X}_t^T \mathbf{y}_t + \mathbf{x}_t^* y_{t+1}] \\ &= \hat{\boldsymbol{\beta}}_t + \mathbf{P}_t \mathbf{x}_t^* y_{t+1} - \mathbf{P}_t \mathbf{x}_t^* k^{-1} \mathbf{x}_t^{*T} \hat{\boldsymbol{\beta}}_t - \mathbf{P}_t \mathbf{x}_t^* k^{-1} (k-1) y_{t+1} \\ &= \hat{\boldsymbol{\beta}}_t + \mathbf{P}_t \mathbf{x}_t^* k^{-1} [y_{t+1} - \mathbf{x}_t^{*T} \hat{\boldsymbol{\beta}}_t] \end{aligned}$$
